# Supplementary material for: Do Children and Adolescents with Overweight or Obesity Adhere to the National Food-Based Dietary Guidelines in Greece?
Source: MDPI journal article supplement (doi:10.3390/children9020256), 2022-02-15
Supplement: s1 [file s1]

Table S1. Recommended dietary intake according to the Greek National guidelines for children and adolescents ([www.diatrofikoiodigoi.gr](http://www.diatrofikoiodigoi.gr))

| Food group            | Age groups            |                      |                          |                          | Portion examples                                                                                                                                                 |
|-----------------------|-----------------------|----------------------|--------------------------|--------------------------|------------------------------------------------------------------------------------------------------------------------------------------------------------------|
|                       | 2-3 years             | 4-8 years            | 9-13 years               | 14-18 years              |                                                                                                                                                                  |
| Vegetables            | 1 portion/day         | 1-2 portions/day     | 2-3 portions/day         | 3-4 portions/day         | 150-200gr of fresh or cooked vegetables                                                                                                                          |
| Fruits                | 1 portion/day         | 1-2 portions/day     | 2-3 portions/day         | 3 portions/day           | 120-200gr of fruit                                                                                                                                               |
| Milk & dairy products | 2 portions/day        | 2-3 portions/day     | 3-4 portions/day         | 3-4 portions/day         | 1 cup (240ml) of milk, 1 cup (200gr) of yogurt, 30gr of hard cheese, 2 tbs of soft cheese, 1 slice of cheese, ½ cup (125ml) of condensed milk                    |
| Cereals               | 3 portions/day        | 4-5 portions/day     | 5-6 portions/day         | 6-8 portions/day         | 1 slice (30gr) of bread, 1 medium rusk, ½ cup (70-90gr) of cooked pasta or rice or bulgur, ½ cup (30gr) of breakfast cereals, 1 medium potato (120-150gr cooked) |
| Lentils               | up to 3 portions/week | 3 portions/week      | at least 3 portions/week | at least 3 portions/week | -                                                                                                                                                                |
|                       | 60-90gr per portion   | 90-120gr per portion | 120-150gr per portion    | 150-200gr per portion    |                                                                                                                                                                  |
| Red and white meat    | 2-3 portions/week     | 2-3 portions/week    | 2-3 portions/week        | 2-3 portions/week        | (grams of portions refer to boneless cooked meat)                                                                                                                |
|                       | 60gr per portion      | 60-90gr per portion  | 90-120gr per portion     | 120-150gr per portion    |                                                                                                                                                                  |
| Eggs                  | 4-7 per week          |                      |                          |                          | -                                                                                                                                                                |

|                                      |                     |                      |                       |                   |                                                                                                                                                                                                |
|--------------------------------------|---------------------|----------------------|-----------------------|-------------------|------------------------------------------------------------------------------------------------------------------------------------------------------------------------------------------------|
| Fish and seafood                     | 2 portions/week     | 2-3 portions/week    | 2-3 portions/week     | 2-3 portions/week | (grams of portions refer to boneless cooked fish)                                                                                                                                              |
|                                      | 60-90gr per portion | 90-120gr per portion | 120-150gr per portion | 150gr per portion |                                                                                                                                                                                                |
| Added fats and oils, olives and nuts | 1-2 portions/day    | 2-3 portions/day     | 3-4 portions/day      | 4-5 portions/day  | 1 tbs of olive oil or other vegetable oil, 1 handful of nuts (18 almonds, 6 whole walnuts, 3 tbs of sunflower seeds), 10-12 olives, 1,5 tbs (25gr) of tahini, 1 tbs (15ml) butter or margarine |
